# Supplementary material
Source: PubMed Central journal article supplement (PMC7168427)
Supplement: MMI-109-509-s001.pdf [file MMI-109-509-s001.pdf]

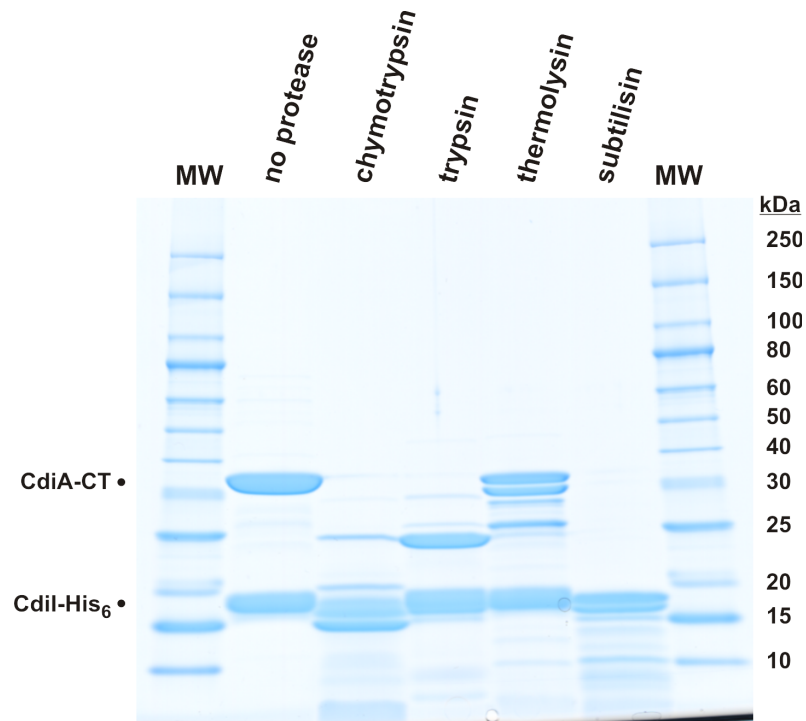

**Figure S1. Limited proteolysis of the CdiA-CT/CdiI<sup>STE031</sup> complex.** Affinity purified complex was treated with chymotrypsin, trypsin, thermolysin or subtilisin and analyzed by SDS-PAGE. The masses of the molecular weight (MW) standards are given to the right of the gel.

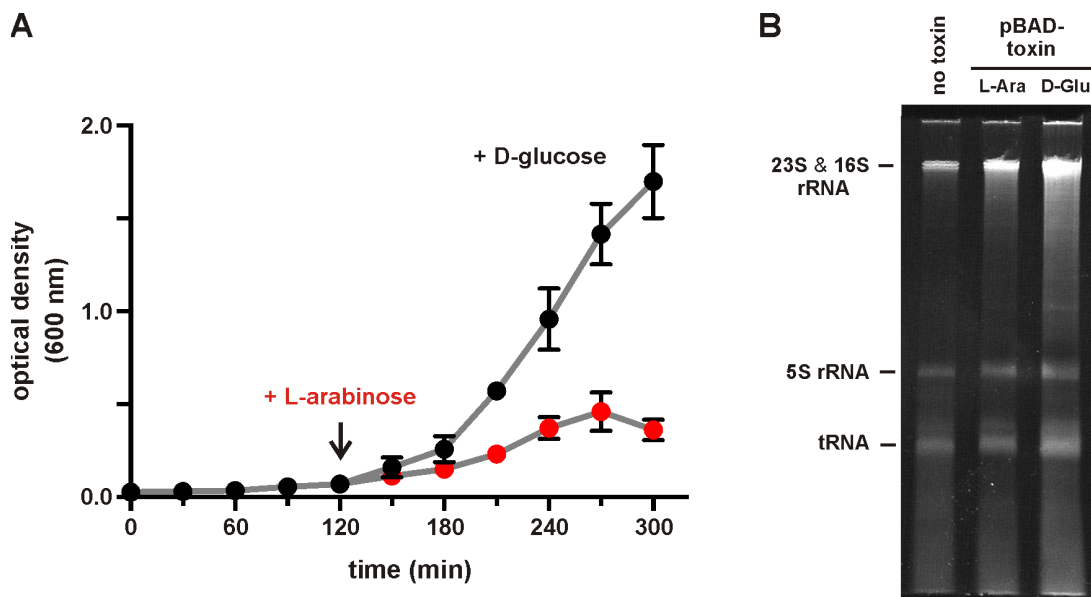

**Figure S2. Activation of CdiA-CT<sup>STECO31</sup> in *E. coli* cells.** **A)** *E. coli* X90 cells carrying pCH13308 were grown in LB media supplemented with 25  $\mu\text{g mL}^{-1}$  tetracycline. After 2 h, cultures were split and one half supplemented with 0.4% D-glucose and the other with 0.2% L-arabinose. Cell growth was monitored by optical density at 600 nm ( $\text{OD}_{600}$ ). The average  $\text{OD}_{600} \pm$  standard deviation is shown for two independent experiments. **B)** Total RNA was extracted from the cultures in panel A at 300 min, run on a denaturing polyacrylamide gel and stained with ethidium bromide. RNA from X90 cells that carry empty vector pCH450 was used as a no toxin control. The migration positions of transfer RNA (tRNA) and ribosomal RNAs (rRNA) are indicated.

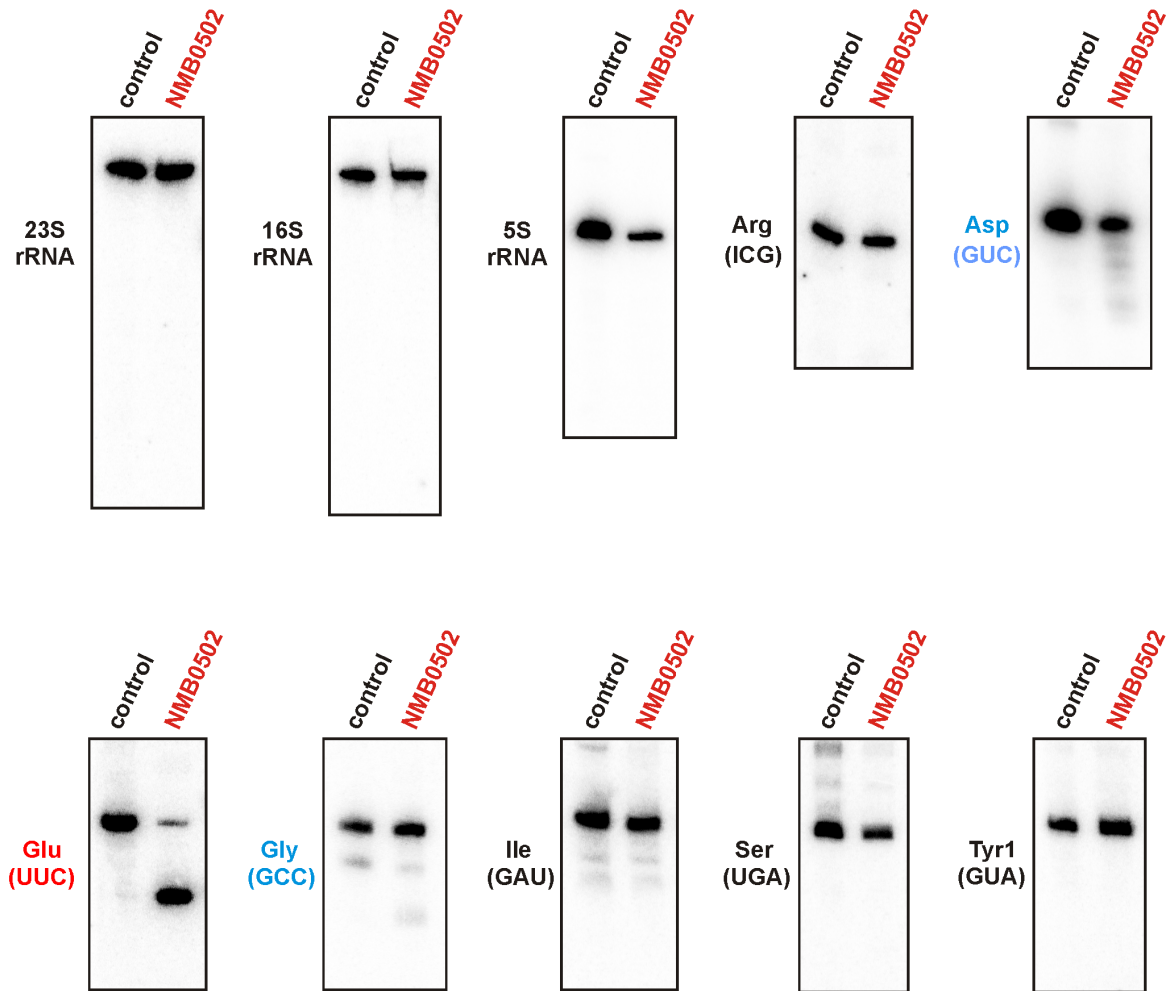

**Figure S3. RNase activity of NMB0502.** *E. coli* X90 cells carrying plasmid pCH13527 were grown in LB media supplemented with 25  $\mu\text{g mL}^{-1}$  tetracycline. NMB0502 expression was induced with 0.4% L-arabinose for 2 h and then total RNA extracted for Northern blot analyses of the indicated rRNAs and tRNAs.

**A**

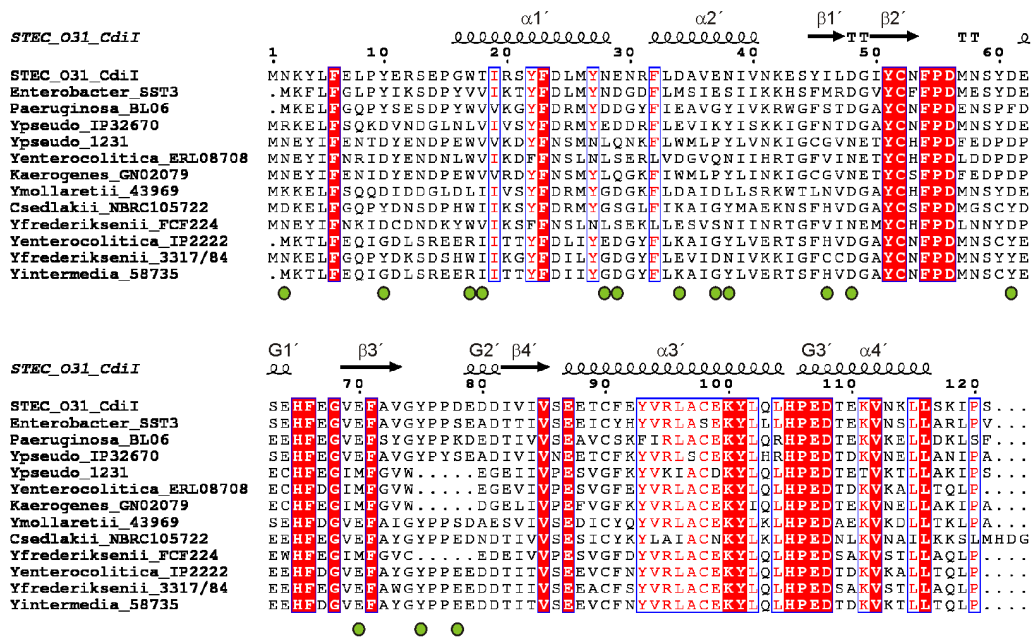

**B**

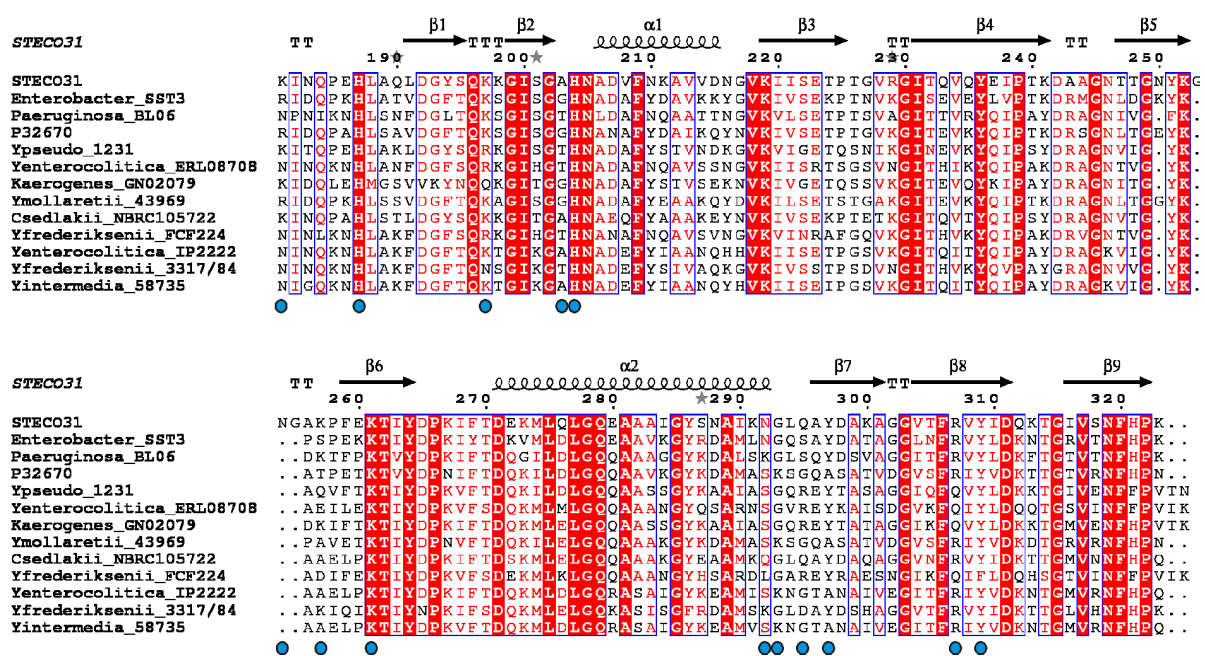

**Figure S4. Close homologs of CdiI<sup>STECO31</sup> and CdiA-CT<sup>STECO31</sup>.** A) CdiI<sup>STECO31</sup> homologs were aligned using Clustal omega and rendered using the ESPrnt 3.0 server. Secondary structure elements for CdiI<sup>STECO31</sup> are shown above the alignment. Sequences are from the following bacterial strains with NCBI protein identifiers given in parentheses: *E. coli* STEC\_031 (misannotated), *Enterobacter* sp. SST3 (WP\_008500122.1), *P. aeruginosa* BL06 (unannotated),

*Y. pseudotuberculosis* IP32670 (WP\_032466733.1), *Y. pseudotuberculosis* 1231 (incorrect), *Y. enterocolitica* ERL08708 (misannotated), *K. aerogenes* GN02079 (misannotated), *Y. mollaretii* ATCC 43969 (WP\_049611435.1), *C. sedlakii* NBRC 105722 (WP\_042289363.1), *Y. frederiksenii* FCF224 (misannotated), *Y. enterocolitica* IP2222 (WP\_019080485.1), *Y. frederiksenii* 3317/84 (WP\_050129232.1), and *Y. intermedia* 58735 (WP\_050075923.1). **B**) EndoU domains from close homologs of CdiA-CTSTECO31 were aligned as described in panel A. Secondary structure elements for CdiA-CT<sup>STECO31</sup> are shown above the alignment. Sequences are from the following bacterial strains with NCBI protein identifiers given in parentheses: *E. coli* STEC\_O31 (WP\_001385946.1), *Enterobacter* sp. SST3 (WP\_008500123.1), *P. aeruginosa* BL06 (ERY54707.1), *Y. pseudotuberculosis* IP32670 (WP\_080987661.1), *Y. pseudotuberculosis* 1231 (WP\_050090717.1), *Y. enterocolitica* ERL08708 (WP\_050159162.1), *K. aerogenes* GN02079 (KLE56124.1), *Y. mollaretii* ATCC 43969 (WP\_004876812.1), *C. sedlakii* NBRC 105722 (WP\_052406297.1), *Y. frederiksenii* FCF224 (WP\_050100436.1), *Y. enterocolitica* IP2222 (WP\_019083962.1), *Y. frederiksenii* 3317/84 (WP\_050129233.1), and *Y. intermedia* 58735 (WP\_050075922.1).

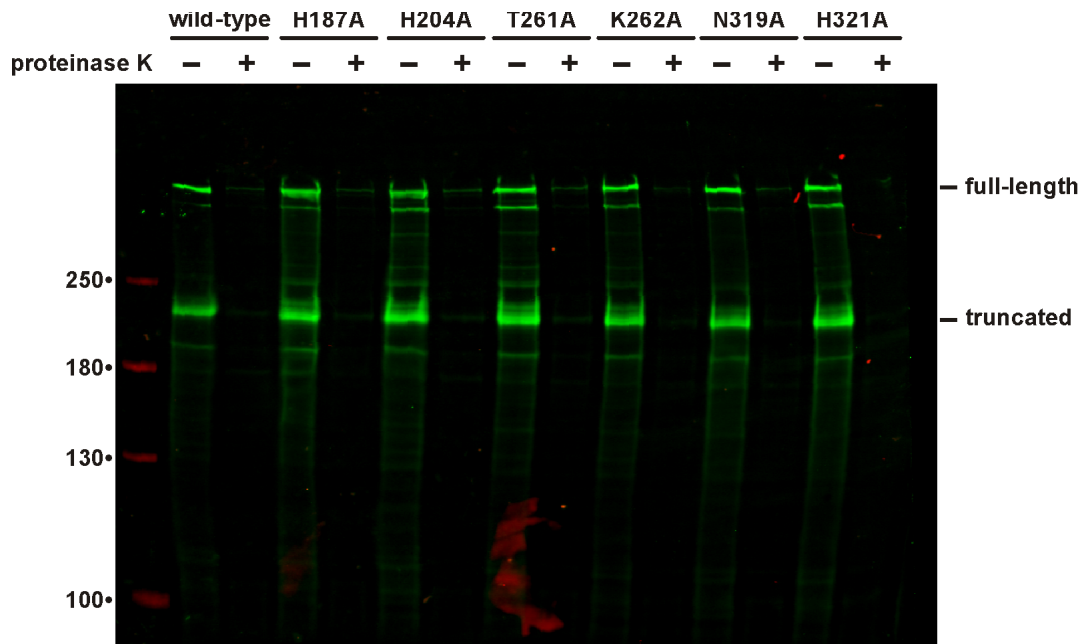

**Figure S5. Immunoblot of chimeric CdiA proteins.** Chimeric CdiA<sup>EC93</sup> proteins that carry the indicated CdiA-CT<sup>STECO31</sup> sequences were analyzed by immunoblotting using polyclonal antibodies to the N-terminal TPS domain of CdiA<sup>EC93</sup>. Where indicated, extracellular protein was digested with proteinase K prior to extraction. Molecular mass standards (in kDa) appear in the red fluorescent channel. The migration positions of full-length and truncated CdiA are indicated on the right of the immunoblot.

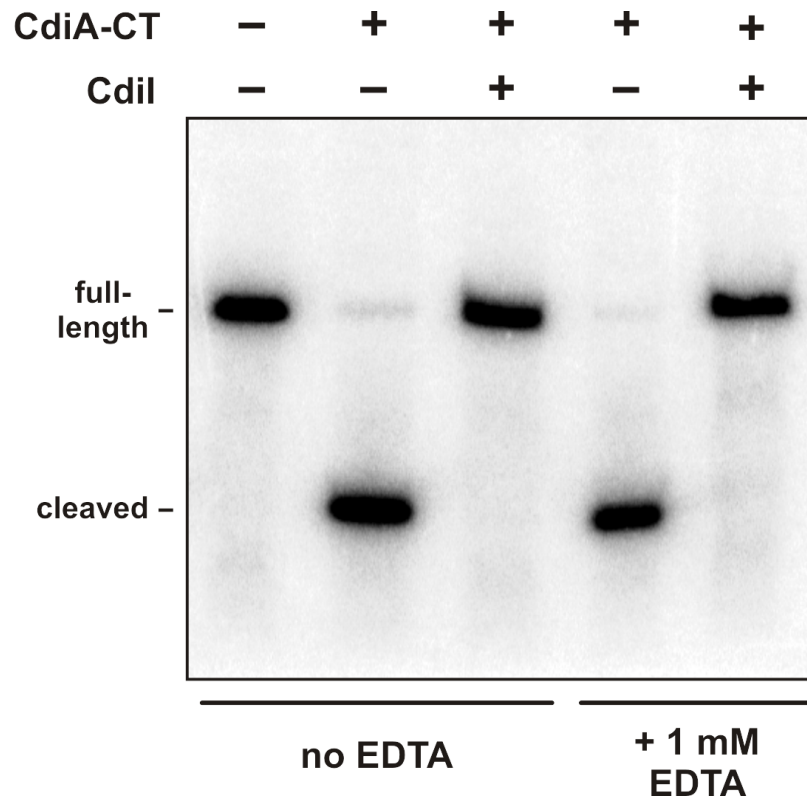

**Figure S6. CdiA-CT<sup>STEC031</sup> tRNase activity is metal-independent.** Purified CdiA-CT<sup>STEC031</sup> was incubated with *E. coli* total RNA for 30 min at 37 °C. Where indicated, reactions were supplemented with purified CdiI<sup>STEC031</sup> and 1 mM EDTA. Reactions were analyzed by Northern blotting using an oligonucleotide probe to tRNA<sub>UUC</sub><sup>Glu</sup>.







**Figure S7. Clades of bacterial EndoU domains.** EndoU domain sequences from predicted CdiA proteins (except BC0920 and MafB1) were aligned using Clustal omega and rendered using the ESPript 3.0 server. Secondary structure elements for CdiA-CT<sup>STEC031</sup> are shown above the alignment. Sequences are from the following bacterial strains with NCBI protein identifiers given in parentheses: *E. coli* STEC\_O31 (WP\_001385946.1), *Enterobacter* sp. SST3 (WP\_008500123.1), *P. aeruginosa* BL06 (ERY54707.1), *Y. pseudotuberculosis* IP32670 (WP\_080987661.1), *Y. pseudotuberculosis* 1231 (WP\_050090717.1), *Y. enterocolitica* ERL08708 (WP\_050159162.1), *K. aerogenes* GN02079 (KLE56124.1), *Y. mollaretii* ATCC 43969 (WP\_004876812.1), *C. sedlakii* NBRC 105722 (WP\_052406297.1), *Y. frederiksenii* FCF224 (WP\_050100436.1), *Y. enterocolitica* IP2222 (WP\_019083962.1), *Y. frederiksenii* 3317/84 (WP\_050129233.1), *Y. intermedia* 58735 (WP\_050075922.1), *N. meningitidis* MC58 (NMB0502: WP\_002225606.1), *B. aquatica* ATCC 35567 (WP\_051323530.1), *P. aeruginosa* M8A.3 (ERX84232.1), *P. aeruginosa* PA103 (EYT98551.1), *A. soli* NIPH 2899 (ENV60496.1), *P. burhodogranariae* DSM 19968 (WP\_008910291.1), *A. baumannii* NIPH 67 (ENW51352.1), *P. putida* MTCC 5279 (WP\_052352499.1), *Acinetobacter* sp. NIPH 2036 (EPG38010.1), *A. bohemicus* ANC 3994 (WP\_004649228.1), *A. baumannii* 1437282 (EXB27428.1), *P. aeruginosa* BL22 (ERY15522.1), *P. syringae* pv. maculicola M4a (KPB79949.1), *P. syringae* pv. tomato T1 (EEB58969.1), *P. cichorii* JBC1 (WP\_025259970.1), *H. sputorum* HK 2154 (WP\_007526435.1), *A. nosocomialis* NIPH 2119 (ENU48137.1), *A. junii* CIP 107470 (WP\_004913022.1), *H. influenzae* (WP\_049380285.1), *M. caprae* DSM 19149 (WP\_029103641.1), *R. syzygii* R24 (CCA87764.1), *Janthinobacterium* sp. CG23\_2 (WP\_054267428.1), *S. maltophilia* (WP\_049455930.1), *B. cereus* ATCC 14579 (BC0920: WP\_000056051.1), *P. agglomerans* str. 3 (KYM73161.1), *C. malonaticus* str. 687 (WP\_050497093.1), *L. goodfellowii* (WP\_026738097.1), *P. multocida* SMC1 (WP\_059245917.1), *C. sakazakii* ATCC 29544 (WP\_052367197.1), *Halothiobacillus* sp. LS2 (WP\_066099932.1), *A. baumannii* OIFC035 (WP\_002132044.1), *P. aeruginosa* PA01 (WP\_010895621.1), *Pantoea* sp. YR525 (SFU93835.1), *K. aerogenes* GN05224 (WP\_080959078.1), *Y. enterocolitica* (CRX52240.1), *P. citronellolis* LMG 18378

(SFD80598.1), *P. rettgeri* (WP\_052219300.1), *P. penneri* ATCC 35198 (EEG86312.1), *G. bethesdensis* CGDNIH3 (WP\_025287064.1), *N. meningitidis* 8013 (MafB1: CAX49352.1), *P. aeruginosa* F9676 (AKQ15993.1), *P. pnomenusa* RB-44 (AHB76644.1), *Pseudovibrio* sp. Ad26 (WP\_063312316.1), and *Cupriavidus* sp. YR651 (SDD11164.1). EndoU clades are indicated to the right of the alignment. Domains marked with asterisks have been characterized here (\*) or elsewhere (\*).

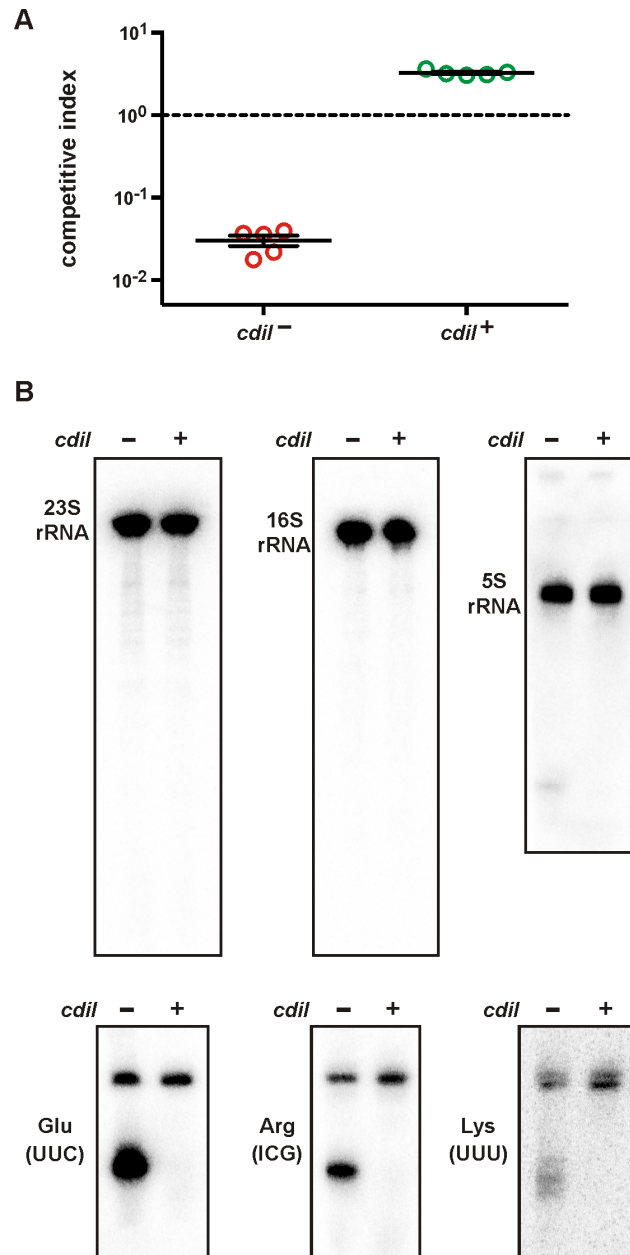

**Figure S8. Growth inhibition and RNase activities of CdiA-CT<sup>GN05224</sup>.** **A)** *E. coli* inhibitors that deploy CdiA-CT<sup>GN05224</sup> were cultured at a 1:1 ratio with *E. coli* target cells that either lack (*cdil*<sup>-</sup>) or carry (*cdil*<sup>+</sup>) the *cdil*<sup>GN05224</sup> immunity gene. Viable inhibitor and target bacteria were enumerated as colony forming units (cfu) at  $t = 0$  and after 1 h of co-culture. Competitive indices  $(\text{cfu}_{t = \text{final}}^{\text{targets}}/\text{cfu}_{t = \text{final}}^{\text{inhibitors}})/(\text{cfu}_{t = 0}^{\text{targets}}/\text{cfu}_{t = 0}^{\text{inhibitors}})$  for five independent experiments are reported together with mean  $\pm$  standard error. **B)** RNA was extracted from the co-cultures in panel A for Northern blot analyses of the indicated rRNAs and tRNAs.

**Table S1. Water-mediated hydrogen bonds at CdiA-CT/Cdil<sup>STEC031</sup> interface.**

| <b>water number</b> | <b>CdiA-CT atom</b> | <b>distance (Å)</b> | <b>Cdil atom</b> | <b>distance (Å)</b> |
|---------------------|---------------------|---------------------|------------------|---------------------|
| HOH 20              | Ser195 (OG)         | 3.06                | Asp61 (OD2)      | 2.98                |
| HOH 20              | Ser195 (OG)         | 3.06                | Ser63 (OG)       | 3.22                |
| HOH 78              | Lys197 (O)          | 2.58                | Asn53 (OD1)      | 3.19                |
| HOH 11              | Lys198 (O)          | 3.04                | Asp48 (OD1)      | 2.82                |
| HOH 11              | Lys198 (O)          | 3.04                | Tyr51 (OH)       | 2.81                |
| HOH 32              | Gln235 (OE1)        | 2.84                | Arg31 (NH1)      | 3.30                |
| HOH 32              | Gln235 (OE1)        | 2.84                | Arg31 (NH2)      | 3.14                |
| HOH 6               | Tyr236 (OH)         | 2.67                | Asp48 (OD1)      | 2.76                |
| HOH 32              | Pro258 (O)          | 2.98                | Arg31 (NH1)      | 3.30                |
| HOH 32              | Pro258 (O)          | 2.98                | Arg31 (NH2)      | 3.14                |
| HOH 8               | Glu260 (N)          | 2.82                | Ile46 (O)        | 2.94                |
| HOH 1               | Glu260 (OE1)        | 2.89                | Asp48 (N)        | 2.91                |
| HOH 102             | Glu260 (OE1)        | 3.02                | Glu 29 (OE1)     | 3.11                |
| HOH 1               | Glu260 (O)          | 2.71                | Asp48 (N)        | 2.91                |
| HOH 6               | Glu260 (O)          | 2.69                | Asp48 (OD1)      | 2.76                |
| HOH 5               | Thr262 (N)          | 2.93                | Asp48 (OD2)      | 2.78                |
| HOH 13              | Gln295 (N)          | 2.82                | Ser21 (OG)       | 2.87                |
| HOH 164             | Gln295 (OE1)        | 2.83                | Val73 (O)        | 2.72                |
| HOH 164             | Gln295 (OE1)        | 2.83                | Asp81 (OD1)      | 3.20                |
| HOH 2               | Ala296 (O)          | 2.78                | Tyr4 (OH)        | 2.65                |
| HOH 102             | Arg307 (NH2)        | 3.01                | Glu29 (OE1)      | 3.11                |
| HOH 29              | Asn319 (ND2)        | 2.87                | Tyr75 (N)        | 2.88                |
| HOH 29              | Ser318 (OG)         | 3.07                | Tyr75 (N)        | 2.88                |

Table S2. Bacterial proteins that contain C-terminal EndoU domains\*

| N-terminal domain           | internal domains                                                                                              | Bacterial species and strain                       | NCBI reference | protein length | EndoU clade | signal sequence | predicted immunity protein |
|-----------------------------|---------------------------------------------------------------------------------------------------------------|----------------------------------------------------|----------------|----------------|-------------|-----------------|----------------------------|
| DUF4280/PAAR-like (PF14107) |                                                                                                               | <i>Clostridium</i> sp. ASBs410                     | WP_025233650.1 | 467            | III         | no              | WP_001188529.1             |
|                             | S-type Pycocin (PF06958)                                                                                      | <i>Marinobacter excellens</i> HL-55                | WP_052503287.1 | 524            | II          | no              | WP_044388809.1             |
|                             | S-type Pycocin (PF06958)                                                                                      | <i>Marinobacter excellens</i> LAMA 842             | KXO10026.1     | 540            | II          | no              | WP_061332007.1             |
| PrsW (PF13367)              |                                                                                                               | <i>Bacillus</i> sp. Leaf13                         | WP_082527539.1 | 687            | III         | no              | WP_056524806.1             |
| PrsW (PF13367)              |                                                                                                               | <i>Bacillus butanolivorans</i> DSM 18926           | WP_083450798.1 | 687            | III         | no              | WP_053346692.1             |
| PrsW (PF13367)              |                                                                                                               | <i>Bacillus</i> sp. Soil768D1                      | WP_082612854.1 | 730            | III         | no              | WP_057217521.1             |
| PrsW (PF13367)              |                                                                                                               | <i>Sporosarcina globispora</i> DSM 4               | WP_082341174.1 | 721            | III         | no              | WP_053435372.1             |
| PrsW (PF13367)              |                                                                                                               | <i>Bacillus litoralis</i> NBRC 102450              | WP_066086865.1 | 677            | III         | no              | WP_066086866.1             |
| PrsW (PF13367)              |                                                                                                               | <i>Bacillus litoralis</i> C44                      | WP_066323900.1 | 739            | III         | no              | WP_066325712.1             |
|                             | phage Mu F (PF04233)                                                                                          | <i>Paenicostridium sordellii</i> R31809            | WP_057569752.1 | 548            | II          | no              | WP_057569753.1             |
|                             | phage Mu F (PF04233)                                                                                          | <i>Paenicostridium sordellii</i> SSCC35109         | WP_057567421.1 | 549            | II          | no              | WP_057567422.1             |
|                             | phage Mu F (PF04233)                                                                                          | <i>Clostridium baratii</i> 2789STDY5834907         | WP_055225338.1 | 552            | II          | no              | WP_054198869.1             |
|                             | phage Mu F (PF04233)                                                                                          | <i>Clostridium paraputrificum</i> LH025            | WP_099328373.1 | 554            | II          | no              | WP_099328374.1             |
|                             | phage Mu F (PF04233)                                                                                          | <i>Clostridium tetani</i> ATCC 453                 | WP_080744638.1 | 537            | II          | no              | WP_035141751.1             |
|                             | phage Mu F (PF04233)                                                                                          | <i>Clostridium</i> phage phiCT453A                 | YP_009216671.1 | 537            | II          | no              | YP_009216672.1             |
|                             | phage Mu F (PF04233)                                                                                          | <i>Clostridium tetani</i> ATCC 454                 | WP_080952904.1 | 537            | II          | no              | WP_035141751.1             |
|                             | phage Mu F (PF04233)                                                                                          | <i>Clostridium fallax</i> DSM 2631                 | SHE61975.1     | 536            | II          | no              | SHE62005.1                 |
|                             | phage Mu F (PF04233)                                                                                          | <i>Paracoccus sanguinis</i> DSM 29303              | WP_052176216.1 | 545            | I           | no              | WP_036731562.1             |
| SpvB (PF03534)              | Rhs repeats; Rhs core                                                                                         | <i>Vibrio harveyi</i> VHJR4                        | WP_049536940.1 | 2,277          | I           | yes             | WP_017817642.1             |
| SpvB (PF03534)              | Rhs repeats; Rhs core                                                                                         | <i>Vibrio harveyi</i> VH5                          | WP_049536940.1 | 2,277          | I           | yes             | WP_017817642.1             |
| SpvB (PF03534)              | Rhs repeats; Rhs core                                                                                         | <i>Vibrio</i> sp. L85                              | WP_079325389.1 | 2,277          | I           | yes             | WP_017817642.1             |
| SpvB (PF03534)              | TcdB; Rhs repeats; Rhs core                                                                                   | <i>Chitinimonas koreensis</i> DSM 14426            | WP_084300605.1 | 2,189          | I           | no              | unannotated                |
| SpvB (PF03534)              | VCBS; TcdB; Rhs repeats; Rhs core                                                                             | <i>Motiliproteus</i> sp. MSK22-1                   | WP_076715109.1 | 2,137          | I           | yes             | WP_076715107.1             |
| SpvB (PF03534)              | Rhs repeats; PT-HINT (PF07591)                                                                                | <i>Actinobacteria</i> bacterium OK074              | KPI03717.1     | 2,301          | I           | yes             | KPI03718.1                 |
| SpvB (PF03534)              | Rhs repeats; Rhs core; PT-HINT (PF07591)                                                                      | <i>Streptomyces</i> sp. SolWspMP-sol7th            | SCD57710.1     | 1,602          | I           | yes             | WP_093853274.1             |
|                             | Laminin_G_3; Rhs repeats; Rhs core; PT-HINT (PF07591)                                                         | <i>Micromonospora echinospora</i> ATCC 15837       | SCF34431.1     | 3,261          | I           | yes             | WP_088984183.1             |
| DNA_pol3_gamma3 (PF12169)   | Rhs repeats; PT-HINT (PF07591)                                                                                | <i>Streptomyces</i> sp. CC77                       | WP_071271283.1 | 2,321          | I           | yes             | WP_071271286.1             |
|                             | Rhs repeats; PT-HINT (PF07591)                                                                                | <i>Streptomyces anulatus</i> ATCC 11523            | WP_079044253.1 | 2,236          | I           | yes             | WP_057665403.1             |
|                             | PT-HINT (PF07591)                                                                                             | <i>Paenibacillus</i> sp. 1ZS3-15                   | WP_068667659.1 | 2,355          | II          | yes             | WP_068667660.1             |
|                             | Rhs repeats; PT-HINT (PF07591)                                                                                | <i>Micrococcus soli</i> DSM 21800                  | WP_091527202.1 | 1,985          | I           | no              | unannotated                |
|                             | Rhs repeats                                                                                                   | <i>Microbacterium testaceum</i> SILB037            | WP_013586481.1 | 1,794          | I           | no              | WP_013586482.1             |
|                             | Rhs repeats                                                                                                   | <i>Rathayibacter tritici</i> NCPPB 1953            | WP_068252818.1 | 1,856          | I           | no              | WP_068252815.1             |
|                             | Rhs repeats                                                                                                   | <i>Cellulomonas massiliensis</i> JC225             | WP_019137609.1 | 1,396          | I           | yes             | WP_019137608.1*            |
|                             | Rhs repeats; PT-HINT (PF07591)                                                                                | <i>Mycobacterium tuberculosis</i> 401416           | CNE28938.1     | 2,321          | I           | yes             | end of contig              |
| Phage_GPD (PF05954)         |                                                                                                               | <i>Paenibacillus glacialis</i> DSM 22343           | WP_068533605.1 | 943            | II          | no              | WP_068533603.1             |
| Phage_GPD (PF05954)         | phage_base_V (PF04717)                                                                                        | <i>Paenibacillus wulumujiangensis</i> Y24          | WP_052723770.1 | 1,017          | III         | no              | unannotated                |
| Phage_GPD (PF05954)         | VgrG superfamily                                                                                              | <i>Paenibacillus durus</i> ATCC 35681              | WP_025698576.1 | 992            | II          | no              | WP_025698578.1             |
| Phage_GPD (PF05954)         | VgrG superfamily                                                                                              | <i>Paenibacillus polymyxa</i> SC2                  | WP_013372466.1 | 965            | II          | no              | WP_013372467.1             |
| Phage_GPD (PF05954)         | VgrG superfamily                                                                                              | <i>Paenibacillus polymyxa</i> KF-1                 | WP_058830052.1 | 965            | II          | no              | WP_013372467.1             |
| Phage_GPD (PF05954)         |                                                                                                               | <i>Paenibacillus polymyxa</i> ND25                 | WP_064961954.1 | 965            | II          | no              | WP_013372467.1             |
| Phage_GPD (PF05954)         |                                                                                                               | <i>Paenibacillus polymyxa</i> 1-43                 | WP_025676073.1 | 965            | II          | no              | WP_013372467.1             |
| Herpes_BLLF1 (PF05109)      |                                                                                                               | <i>Nocardia asteroides</i> NBRC 15531              | GAD85392.1     | 852            | II          | no              | unannotated                |
| Herpes_BLLF1 (PF05109)      |                                                                                                               | <i>Pilimelia anulata</i> NRRL B-3741               | WP_081723179.1 | 776            | II          | no              | unannotated                |
| Herpes_BLLF1 (PF05109)      |                                                                                                               | <i>Nocardia asteroides</i> DSM 43373               | SFL70581.1     | 886            | II          | no              | unannotated                |
| DNA_pol3_gamma3 (PF12169)   | Spc7 (PF15402); Pneumovirinae glycoprotein G (PF05539); cADP-ribose hydrolase (PF02267); sialomucin (PF05283) | <i>Deinococcus aequitilis</i> DSM 23025            | WP_020621305.1 | 1,686          | III         | no              | WP_019008896.1             |
|                             | DNA_pol3_gamma3 (PF12169); Nucleotidyl transferase AbiEii toxin (PF08843)                                     | <i>Nocardia harenae</i> NBRC 108248                | WP_067654967.1 | 2,768          | I           | no              | none                       |
|                             | Nucleotidyl transferase AbiEii toxin (PF08843)                                                                | <i>Nocardia aobensis</i>                           | WP_036509317.1 | 1,851          | I           | no              | none                       |
|                             | FigD_Ig (PF13860); PT-HINT (PF07591)                                                                          | <i>Brevibacillus</i> sp. Leaf182                   | WP_056491400.1 | 1,841          | II          | yes             | WP_056491398.1             |
|                             | FigD_Ig (PF13860); PT-HINT (PF07591)                                                                          | <i>Brevibacillus brevis</i> GZDF3.1                | WP_064201482.1 | 1,841          | II          | yes             | WP_064201483.1             |
|                             | Isopren_C2-like (PF00432)                                                                                     | <i>Planomicrobium glaciei</i> UCD-HAM              | WP_053167008.1 | 1,018          | III         | yes             | WP_036809033.1             |
|                             | Isopren_C2-like (PF00432)                                                                                     | <i>Planomicrobium glaciei</i> CGMCC 1.6846         | WP_074509029.1 | 1,018          | III         | yes             | WP_083335251.1             |
| SMC_prok_A                  | Yeba_transglutaminase (PF08379)                                                                               | <i>Acetivibrio cellulolyticus</i> CD2              | WP_010251285.1 | 1,382          | III         | yes             | WP_010251287.1             |
| TANFOR                      | fibronectin type 3                                                                                            | <i>Tenacibaculum ovolyticum</i> DSM 18103          | WP_028888923.1 | 2,154          | III         | no              | WP_028888924.1             |
| Neuromodulin_N (PF10580)    |                                                                                                               | <i>Paenibacillus</i> sp. FSL R5-0912               | WP_052416555.1 | 1,359          | I           | no              | WP_042237393.1             |
|                             | Bacuni_01323_like (PF15283); Rhs repeats                                                                      | Chitinophagaceae bacterium PMP191F                 | WP_054284430.1 | 1,506          | I           | no              | WP_054284431.1             |
|                             | PT-TG (PF14449)                                                                                               | <i>Fusobacterium</i> sp. HMSC064B11                | WP_070766574.1 | 466            | II          | no              | WP_060496433.1             |
|                             | PT-TG (PF14449)                                                                                               | <i>Fusobacterium</i> sp. OBRC1                     | EUB34025.1     | 466            | II          | no              | EUB34019.1                 |
|                             | peptidase_M23 (PF01551); PT-TG (PF14449)                                                                      | <i>Streptomyces</i> sp. 769                        | WP_078876371.1 | 671            | II          | yes             | WP_040108218.1*            |
|                             |                                                                                                               | <i>Providencia burhodogranariae</i> DSM 19968      | WP_008910513.1 | 1,394          | I           | no              | WP_008910514.1             |
|                             |                                                                                                               | <i>Mycobacterium</i> sp. UM_RHS                    | WP_024451231.1 | 523            | I           | no              | WP_024451230.1             |
|                             |                                                                                                               | <i>Mycobacterium vulneris</i> ACS3670              | WP_065516086.1 | 524            | I           | no              | WP_065516085.1             |
|                             |                                                                                                               | <i>Saccharopolyspora antimicrobica</i> CPCC 201259 | SFN01621.1     | 427            | I           | no              | SFN01652.1                 |
|                             |                                                                                                               | <i>Rhodococcus rhodii</i> LMG 5362                 | WP_010837416.1 | 451            | I           | no              | WP_010837417.1             |
|                             |                                                                                                               | <i>Streptococcus parasanguinis</i> ATCC 15912      | AEH55766.1     | 416            | II          | no              | AEH55765.1                 |
|                             |                                                                                                               | <i>Clostridium sporogenes</i> ATCC 19404           | WP_061311230.1 | 561            | II          | no              | WP_046340402.1             |
|                             |                                                                                                               | <i>Rugamonas rubra</i> ATCC 43154                  | SFM63091.1     | 454            | II          | no              | unannotated                |
|                             |                                                                                                               | <i>Nitiliruptor alkaliphilus</i> DSM 45188         | WP_052668235.1 | 700            | II          | no              | WP_052668236.1             |
|                             |                                                                                                               | <i>Thermoactinomyces vulgaris</i> NRRL F-5595      | WP_054096214.1 | 490            | III         | no              | WP_022737160.1             |
|                             |                                                                                                               | <i>Runella limosa</i> DSM 17973                    | WP_051398261.1 | 545            | III         | no              | WP_028526235.1             |

\*Table does not include predicted MafB, T6SS-linked Rhs proteins, T7SS or T5SS/CdiA effector proteins.

Table S3. Predicted Actinobacterial proteins with internal EndoU domains.

| Bacterial species and NCBI ID                                                          | from                                                                            | to         | E-value                 | Conserved domains           |                       |
|----------------------------------------------------------------------------------------|---------------------------------------------------------------------------------|------------|-------------------------|-----------------------------|-----------------------|
| <b><i>Saccharomonospora marina</i> XMU15</b><br>WP_009151954.1<br>14,511 residues      | 5,273                                                                           | 5,446      | 6.61E-05                | SMC_N superfamily           | ci25732               |
|                                                                                        | 7,554                                                                           | 7,760      | 6.50E-07                | Amidoligase_2 superfamily   | ci13634               |
|                                                                                        | 9,686                                                                           | 9,778      | 5.08E-08                | EndoU_bacteria              | PF14436               |
|                                                                                        | 10,410                                                                          | 10,620     | 0.000932258             | SMC_N superfamily           | ci25732               |
|                                                                                        | 11,831                                                                          | 12,195     | 0.00143364              | DNA_pol3_gamma3 superfamily | ci26386               |
| <b><i>Amycolatopsis thermoflava</i> N1165</b><br>WP_027931422.1<br>18,636 residues     | 580                                                                             | 797        | 3.71E-11                | Rho superfamily             | ci28310               |
|                                                                                        | 2,568                                                                           | 2,671      | 1.00E-18                | EndoU_bacteria              | PF14436               |
|                                                                                        | 2,772                                                                           | 2,923      | 0.000713927             | Rho superfamily             | ci28310               |
|                                                                                        | 7,776                                                                           | 8,003      | 0.00688798              | DUF3084 superfamily         | ci26472               |
|                                                                                        | 9,279                                                                           | 9,450      | 0.0010978               | DNA_pol3_delta2 superfamily | ci26247               |
|                                                                                        | 16,935                                                                          | 17,178     | 2.08E-08                | APH                         | PF01636               |
| <b><i>Nocardia anaemiae</i> NBRC 100462</b><br>WP_062988149.1<br>13,740 residues       | 422                                                                             | 968        | 8.44E-13                | Atrophin-1 superfamily      | ci26464               |
|                                                                                        | 801                                                                             | 1,181      | 7.76E-07                | Atrophin-1 superfamily      | ci26464               |
|                                                                                        | 1,211                                                                           | 1,671      | 5.12E-15                | Atrophin-1 superfamily      | ci26464               |
|                                                                                        | 1,502                                                                           | 1,987      | 3.14E-07                | Herpes_ICP4_C superfamily   | ci28033               |
|                                                                                        | 2,122                                                                           | 2,162      | 0.00431773              | HTH_Lacli                   | cd01392               |
|                                                                                        | 2,170                                                                           | 2,211      | 1.64E-06                | HTH_Lacli                   | cd01392               |
|                                                                                        | 2,170                                                                           | 2,257      | 0.000114812             | PurR                        | COG1609               |
|                                                                                        | 2,687                                                                           | 2,742      | 5.11E-06                | Peripla_BP_4 superfamily    | ci26188               |
|                                                                                        | 2,922                                                                           | 2,993      | 0.000192999             | EndoU_bacteria superfamily  | PF14436               |
|                                                                                        | 3,386                                                                           | 3,446      | 5.78E-07                | HTH superfamily             | ci21459               |
|                                                                                        | 3,489                                                                           | 3,545      | 0.00879089              | HTH superfamily             | ci21459               |
|                                                                                        | 3,779                                                                           | 3,842      | 6.39E-05                | HTH superfamily             | ci21459               |
|                                                                                        | 5,981                                                                           | 6,273      | 3.44E-16                | MFS_1                       | PF07690               |
|                                                                                        | 6,682                                                                           | 6,990      | 0.00435585              | PRK10246 superfamily        | ci25731               |
|                                                                                        | 7,349                                                                           | 7,769      | 0.000145206             | Atrophin-1 superfamily      | ci26464               |
|                                                                                        | 7,605                                                                           | 7,951      | 5.03E-07                | Atrophin-1 superfamily      | ci26464               |
|                                                                                        | 7,804                                                                           | 7,862      | 2.44E-10                | HTH_LUXR                    | smart00421            |
|                                                                                        | 9,049                                                                           | 9,616      | 6.95E-107               | D-aminoacylase              | cd01297               |
|                                                                                        | 9,535                                                                           | 9,737      | 7.84E-06                | Adenine_deam_C superfamily  | ci26189               |
| 9,859                                                                                  | 9,914                                                                           | 0.0001258  | HTH superfamily         | ci21459                     |                       |
| 10,517                                                                                 | 10,875                                                                          | 1.46E-08   | MFS                     | cd06174                     |                       |
| 11,209                                                                                 | 11,293                                                                          | 1.90E-06   | Bac_transf superfamily  | ci27431                     |                       |
| 11,915                                                                                 | 12,129                                                                          | 1.42E-12   | APH                     | PF01636                     |                       |
| <b><i>Amycolatopsis methanolica</i> 239</b><br>WP_017981396.1<br>14,703 residues       | 617                                                                             | 784        | 1.77E-08                | Rho superfamily             | ci28310               |
|                                                                                        | 2,103                                                                           | 2,305      | 3.13E-08                | Rho superfamily             | ci28310               |
|                                                                                        | 2,630                                                                           | 2,733      | 3.00E-24                | EndoU_bacteria              | PF14436               |
|                                                                                        | 5,160                                                                           | 5,346      | 0.00540722              | DNA_pol3_gamma3 superfamily | ci26386               |
|                                                                                        | 5,282                                                                           | 5,515      | 0.00247255              | DNA_pol3_gamma3 superfamily | ci26386               |
|                                                                                        | 5,774                                                                           | 6,304      | 0.00257397              | SMC_N superfamily           | ci25732               |
|                                                                                        | 5,883                                                                           | 6,111      | 0.00247865              | TolC                        | COG1538               |
|                                                                                        | 11,529                                                                          | 11,782     | 3.76E-05                | APH superfamily             | ci28124               |
|                                                                                        | 11,701                                                                          | 11,774     | 2.11E-05                | PKc_like superfamily        | ci21453               |
|                                                                                        | <b><i>Amycolatopsis</i> sp. ATCC 39116</b><br>WP_020416785.1<br>17,637 residues | 620        | 822                     | 2.68E-09                    | Rho superfamily       |
| 775                                                                                    |                                                                                 | 928        | 0.00385785              | PHA03169 superfamily        | ci27451               |
| 1,367                                                                                  |                                                                                 | 1,568      | 0.00181477              | PRK09169 superfamily        | ci28514               |
| 2,625                                                                                  |                                                                                 | 2,726      | 3.00E-26                | EndoU_bacteria              | PF14436               |
| 9,488                                                                                  |                                                                                 | 9,703      | 0.00488948              | DNA_pol3_gamma3 superfamily | ci26386               |
| 11,983                                                                                 |                                                                                 | 12,153     | 5.20E-05                | FUSC superfamily            | ci26163               |
| 12,093                                                                                 |                                                                                 | 12,349     | 0.000129751             | SMC_N superfamily           | ci25732               |
| 13,738                                                                                 |                                                                                 | 13,983     | 1.25E-10                | APH                         | PF01636               |
| 14,124                                                                                 |                                                                                 | 14,519     | 5.49E-06                | DUF390 superfamily          | ci25642               |
| <b><i>Amycolatopsis taiwanensis</i> DSM 45107</b><br>WP_043840807.1<br>27,216 residues |                                                                                 | 528        | 645                     | 2.91E-06                    | Endomucin superfamily |
|                                                                                        | 531                                                                             | 789        | 2.55E-05                | Herpes_BLLF1 superfamily    | ci25496               |
|                                                                                        | 1,848                                                                           | 1,931      | 0.000120741             | EndoU_bacteria superfamily  | PF14436               |
|                                                                                        | 2,043                                                                           | 2,243      | 1.16E-05                | Rho superfamily             | ci28310               |
|                                                                                        | 2,546                                                                           | 3,127      | 3.32E-41                | SecA_DEAD superfamily       | ci26882               |
|                                                                                        | 3,486                                                                           | 3,806      | 0.00883741              | DUF390 superfamily          | ci25642               |
|                                                                                        | 7,470                                                                           | 7,702      | 0.00196047              | APH superfamily             | ci28124               |
|                                                                                        | 13,039                                                                          | 13,284     | 3.62E-06                | APH                         | PF01636               |
|                                                                                        | 13,215                                                                          | 13,279     | 1.13E-06                | PKc_like superfamily        | ci21453               |
|                                                                                        | 17,042                                                                          | 17,430     | 1.67E-05                | Atrophin-1 superfamily      | ci26464               |
| 25,109                                                                                 | 25,199                                                                          | 0.00261893 | Gln_amidase superfamily | ci21436                     |                       |

**Table S4.** Oligonucleotides

| Identifier | Descriptive name | Sequence                                                                  |
|------------|------------------|---------------------------------------------------------------------------|
| 204F40     |                  | 5'-GTC TCT CCC ATG GTT GAT AAT AAC TAC CTG AGC<br>GTG TCT G               |
| 204R49     |                  | 5' - TGG TGG TGC CCA GCG GAT GGG ATT TTA GAC AGT<br>AAT TTG TTT ACT TTT T |
| 204CdiIF   |                  | 5'-GTC TCT CCC ATG AAT AAA TAT TTA TTT GAA TTG CCA<br>TAT GAA CGT TCT G   |
| CH367      | Gly-GCC-probe    | 5' - CTT GGC AAG GTC GTG CT                                               |
| CH368      | Pro-GGG-probe    | 5' - CAC CCC ATG ACG GTG CG                                               |
| CH374      | Ala-UGC-probe    | 5' - TCC TGC GTG CAA AGC AG                                               |
| CH379      | Arg-CCU-probe    | 5' - CCT GCA ATT AGC CCT TAG G                                            |
| CH380      | Gly-UCC-probe    | 5' - CCC GCA TCA TCA GCT TGG AAG GC                                       |
| CH381      | Leu-CAA-probe    | 5' - CCC GCA CAG CGC GAA CGC CG                                           |
| CH382      | Phe-GAA-probe    | 5' - TGC TCT ACC GAC TGA GCT A                                            |
| CH383      | Pro-CGG-probe    | 5' - CTT CGT CCC GAA CGA AGT G                                            |
| CH385      | Thr-CGU-probe    | 5' - CCT ACG ACC TTC GCA TT                                               |
| CH406      | 5S probe         | 5' - ATG CCT GGC AGT TCC CTA CTC TC                                       |
| CH407      | 16S probe        | 5' - TGC GCT TTA CGC CCA GTA ATT CC                                       |
| CH408      | 23S probe        | 5' - GTT TAG CCC CGT TAC ATC TTC CG                                       |
| CH436      | Arg-CCG-probe    | 5' - CCT GAG ACC TCT GCC TCC GGA                                          |
| CH451      | Arg-UCU-probe    | 5' - CCT GCG GCC CAC GAC TTA G                                            |
| CH452      | Arg-ICG-probe    | 5' - CCT CCG ACC GCT CGG TTC G                                            |
| CH487      | Cys-GCA-probe    | 5' - GGA CTA GAC GGA TTT GCA A                                            |
| CH577      | Ile-GAU-probe    | 5' - ACC GAC CTC ACC CTT ATC AG                                           |
| CH618      | Trp-CCA-probe    | 5' - CCC AAC ACC CGG TTT TGG                                              |
| CH791      | Gln-CUG-probe    | 5' - TCG GAA TGC CGG AAT CAG A                                            |
| CH798      | Tyr1-GUA-probe   | 5' - CTT CGA AGT CTG TGA CGG CAG                                          |
| CH799      | Tyr2-GUA-probe   | 5' - CTT CGA AGT CGA TGA CGG CAG                                          |
| CH800      | Asp-QUC-probe    | 5' - TCG AAC CCG CGA CCC CCT GCG                                          |
| CH801      | Asn-QUU-probe    | 5' - CTC GAA CCA GTG ACA TAC GG                                           |
| CH837      | Ser-GCU-probe    | 5' - CCC CGG ATG CAG CTT TTG ACC                                          |
| CH1046     | Leu-GAG-probe    | 5' - CCC GTA AGC CCT ATT GGG CA                                           |



|        |                      |                                                                                 |
|--------|----------------------|---------------------------------------------------------------------------------|
| CH1047 | Ser-UGA-probe        | 5' - AAC CCT TTC GGG TCG CCG GTT TTC                                            |
| CH1248 | Val-UAG-probe        | 5' - CGC CGA CCC CCT CCT TGT AAG                                                |
| CH1249 | Lys-UUU-probe        | 5' - CCT GCG ACC AAT TGA TTA AA                                                 |
| CH1417 | Glu-UUC-probe        | 5' - CCC CTG TTA CCG CCG TG                                                     |
| CH1706 | BC0921-Nhe-rev       | 5' - CTC TAT GCT AGC TTT CAA TTC TTT ATT TTT TCC                                |
| CH2032 | Gly-CCC-probe        | 5' - CCC TCG TAT AGA GCT TGG GAA                                                |
| CH2034 | Leu-CAG-probe        | 5' - CCC CCA CGT CCG TAA GGA CA                                                 |
| CH2035 | Leu-UAG-probe        | 5' - CAC CTT GCG GCG CCA GAA                                                    |
| CH2036 | Leu-UAA-probe        | 5' - CCC GCA CAG CGC GAA CGC CG                                                 |
| CH2037 | fMet-CAU-probe       | 5' - CGG GTT ATG AGC CCG ACG A                                                  |
| CH2038 | Met-CAU-probe        | 5' - CCT GTG ACC CCA TCA TTA TGA                                                |
| CH2040 | Ser-CGA-probe        | 5' - GTA GAG TTG CCC CTA CTC CGG                                                |
| CH2042 | Thr-GGU-probe        | 5' - CTG GGG ACC CCA CCC CT                                                     |
| CH2784 | NMB0503-Kpn-for      | 5' - GGT GGT ACC ATG AAA AAT AAT ATT TTT C                                      |
| CH2785 | NMB0503-Spe-rev      | 5' - TTC ACT AGT GGT TTC ATG CAG GCT AC                                         |
| CH2839 | NMB0502-Nco-for      | 5' - CTC CCA TGG TGA AAA ATA ATC AGC                                            |
| CH3172 | EC3006-CT(OE)-for    | 5' - CAG GTA GGA ACT CGG TTG AGA ATA ATT ATC TTA<br>GCG TGT CTG AAA AGA CAG AGC |
| CH3538 | STECO31-CT-Nco-for   | 5' - TTT CCA TGG TTG ATA ATA ACT ACC                                            |
| CH3539 | STECO31-cdil-Spe-rev | 5' - TTT ACT AGT GGA TGG GAT TTT AGA C                                          |
| CH3569 | STECO31-mid-rev      | 5' - GGT CTG GTG TCT AAC CTT TGG TTA GGA TGG GAT<br>TTT AGA CAG TAA TT          |
| CH3624 | STECO31-cdil-Xho-rev | 5' - TTT CTC GAG TTA GGA TGG GAT TTT AG                                         |
| CH3747 | Ymol-mid-for         | 5' - CAG GTA GGA ACT CGG TTG AGA ATA ATA ACC TTA<br>GTT TTG GCA AAG G           |
| CH3748 | Ymol-mid-rev         | 5' - GGT CTG GTG TCT AAC CTT TGG GTT AAG CAG GTA<br>ATT TAG TCA GTA AAT C       |
| CH3854 | STECO31-cdil-Kpn-for | 5' - TTT GGT ACC ATG AAT AAA TAT TTA TTT GAA TTG C                              |
| CH3976 | Ymol-cdil-Kpn-for    | 5' - TTT GGT ACC ATG AAA AAG GAA TTA TTT AGT CAA C                              |
| CH3977 | Ymol-cdil-Spe-rev    | 5' - TTT ACT AGT AGC AGG TAA TTT AGT CAG                                        |
| CH4016 | STECO31-H187A-rev    | 5' - CAA GTT GAG CTA AGG CTT CCG GCT G                                          |
| CH4017 | STECO31-H204A-rev    | 5' - GAA TAC ATC AGC ATT AGC TGC ACC GCT AAT TCC                                |

|        |                      |                                                                                   |
|--------|----------------------|-----------------------------------------------------------------------------------|
| CH4018 | STECO31-N319A-rev    | 5' - CCT ATT TCG GGT GGA AGG CAC TTA CAA TTC C                                    |
| CH4019 | STECO31-H321A-rev    | 5' - CCT ATT TCG GGG CGA AGT TAC TTA CAA TTC C                                    |
| CH4100 | EC93-cdiA-8220-for   | 5' - GAA GCG ATG AAA GCA GCC AGG                                                  |
| CH4101 | EC93-cdiA-8718-rev   | 5' - CTC AAC CGA GTT CCT ACC TGC CTG                                              |
| CH4102 | EC93-cdil-296-for    | 5' - AAC CCA AAG GTT AGA CAC CAG ACC                                              |
| CH4103 | EC93-cdil-+486-rev   | 5' - AAG TAG GCA TTC TCG ACC CTG                                                  |
| CH4269 | STECO31-K261A-rev    | 5' - ATC ATA AAT AGT GGC CTC AAA AGG CTT                                          |
| CH4270 | STECO31-T262A-rev    | 5' - AGG ATC ATA AAT GGC TTT CTC AAA AGG                                          |
| CH4272 | gltW-C33-marker      | 5' - GAT TCG AAC CCC TGT TAC CGC CGT GAA A                                        |
| CH4273 | gltW-U36-marker      | 5' - GGA TTC GAA CCC CTG TTA CCG CCG TG                                           |
| CH4274 | gltW-C39-marker      | 5' - GGA TTC GAA CCC CTG TTA CCG CC                                               |
| CH4275 | gltW-RT-primer       | 5' - GGA TTC GAA CCC CTG TTA CC                                                   |
| CH4398 | BC0921-Kpn-for       | 5' - ACA GGT ACC ATG AAA TAT CCA TAT AGC TTT GAA G                                |
| CH4649 | tRNA-Glu 5' probe    | 5' - GAA AGG GCG GTG TCC TG                                                       |
| SK693  | GN05224-CT-for       | 5' - TTC TTG GGG CCG GAG AGC CGA GAG                                              |
| SK694  | GN05224-CT-rev       | 5' - CCG GCG ATC TGC CGG TGT ACA AGC                                              |
| SK733  | GN05224-cdil-Kpn-for | 5' - GAG CGG TAC CAT GAG TAT TAA TAA TAG                                          |
| SK734  | GN05224-cdil-Xho-rev | 5' - GAG GCT CGA GTT ATC TCT TAT TTT CTG G                                        |
| SK724  | GN05224-CT-Nco-for   | 5' - CAG ACC ATG GTG GAG AAT AAC TTC TTG GG                                       |
| DL3986 | GN05224-cdil-Xho-rev | 5' - CCA GCT CGA GTC TCT TAT TTT CTG GAT TAA TAT<br>ATA AAT ACC TAT TAT CTA TTT C |
